# Supplementary material
Source: PubMed Central journal article supplement (PMC5289840)
Supplement: 605Table_S1.pdf [file 605Table_S1.pdf]

**Table S1: Primers used for qRT-PCR.**

| <b>Name</b>   | <b>Sequence</b>          |
|---------------|--------------------------|
| <b>RpL32F</b> | AAGCGGCGACGCACTCTGTT     |
| <b>RpL32R</b> | GCCCAGCATAACAGGCCCAAG    |
| <b>Act5CF</b> | GGCGCAGAGCAAGCGTGGTA     |
| <b>Act5CR</b> | GGGTGCCACACGCAGCTCAT     |
| <b>bcdF</b>   | GCTACAGATCTTGGAGCCTTT    |
| <b>bcdR</b>   | CGTATCCATCGTGCATTGATATTG |
| <b>dahF</b>   | GTCTACGATCCCACTCCATATC   |
| <b>dahR</b>   | CTCGCCCAAATAGCTGAGTAA    |
| <b>egrF</b>   | GAGACCCTCAAGCCGTTTAT     |
| <b>egrR</b>   | CTCCTTGTCCAGATGCGATAC    |
| <b>Gfat1F</b> | CGGGCTTGAAGAGATTGGAATA   |
| <b>Gfat1R</b> | CGCTGAAGTGCTCTTGAATTG    |
| <b>hgoF</b>   | CCTCAAGTGTGCCCATACAA     |
| <b>hgoR</b>   | CAACGAAGCTGGTTTGGATTC    |
| <b>moiraF</b> | GAATTCCGATGCGTTGCTTTC    |
| <b>moiraR</b> | TCGGGCAGGTCAAAGTTATTC    |
| <b>slamF</b>  | CGAGGCTGAGGAAAGTGAATC    |
| <b>slamR</b>  | CGGAGTCCGTTGAGGTTATTG    |
| <b>zfh1F</b>  | GCAACTCCGCCTACGATTT      |
| <b>zfh1R</b>  | GAAGGCCTTGTGGCAGAT       |
